# Supplementary material for: The Impact on Employment for Rural Cancer Patients and Their Caregivers Travelling to Major Cities for Treatment
Source: Hindawi journal article supplement (doi:10.1155/2023/6728504), 2023-08-29
Supplement: f1 [file 6728504.f1.docx]

**Supplementary Figure 1:** Flowchart showing recruitment of participants to a longitudinal study of rural cancer patients and their caregivers and those included in this analysis of changes to employment.


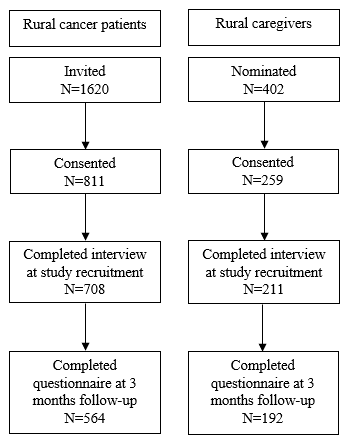


**Supplementary Table 1.** Comparison of rural cancer patients included in this analysis with those excluded due to missing employment data.

|  | **Excluded (N=103)** | | **Included (N=708)** | | ***P* Value** |
| --- | --- | --- | --- | --- | --- |
|  | **N (%)** | | **N (%)** | |  |
| **Gender** |  |  |  |  | 0.3 |
| Male | 59 | (58%) | 368 | (53%) |  |
| Female | 42 | (42%) | 326 | (47%) |  |
| **Age** |  |  |  |  | 0.4 |
| <65 years | 44 | (44%) | 334 | (48%) |  |
| ≥65 years | 57 | (56%) | 359 | (52%) |  |
| **Area-level disadvantage (SEIFA)** |  |  |  |  | 0.9 |
| Low (≤50th percentile) | 84 | (82%) | 578 | (82%) |  |
| High (>50th percentile) | 19 | (18%) | 126 | (18%) |  |
| **Education** |  |  |  |  | **0.04** |
| Year 12 or below | 30 | (31%) | 285 | (42%) |  |
| Vocational / University | 68 | (69%) | 397 | (58%) |  |
| **Geographical remoteness (ARIA)** |  |  |  |  | 0.2 |
| Major city | 7 | (7%) | 29 | (4%) |  |
| Inner regional | 35 | (34%) | 318 | (45%) |  |
| Outer regional | 52 | (50%) | 301 | (43%) |  |
| Remote / Very remote | 9 | (9%) | 56 | (8%) |  |
| **Relationship status** |  |  |  |  | 0.2 |
| In a relationship | 59 | (57%) | 452 | (64%) |  |
| Not in a relationship | 44 | (43%) | 256 | (36%) |  |
| **Cancer type of patient** |  |  |  |  | **<0.001** |
| Breast | 7 | (7%) | 125 | (18%) |  |
| Skin | 9 | (9%) | 83 | (12%) |  |
| Head and Neck | 12 | (12%) | 107 | (15%) |  |
| Prostate | 8 | (8%) | 82 | (12%) |  |
| Gynaecological | 8 | (8%) | 61 | (9%) |  |
| Other | 22 | (21%) | 230 | (32%) |  |
| Unknown | 35 | (34%) | 10 | (1%) |  |
| No diagnosis | 2 | (2%) | 10 | (1%) |  |

**Supplementary Table 2.** Comparison of rural caregivers included in this analysis with those excluded due to missing employment data.

|  | **Excluded (N=48)** | | **Included (N=211)** | | ***P* Value** |
| --- | --- | --- | --- | --- | --- |
|  | **N** | **(%)** | **N** | **(%)** |  |
| **Gender** |  |  |  |  | 0.4 |
| Male | 16 | (33%) | 81 | (39%) |  |
| Female | 32 | (67%) | 125 | (61%) |  |
| **Age** |  |  |  |  | 0.5 |
| <65 years | 27 | (57%) | 106 | (52%) |  |
| ≥65 years | 20 | (43%) | 98 | (48%) |  |
| **Education** |  |  |  |  | 0.9 |
| Year 12 or below | 20 | (54%) | 111 | (55%) |  |
| Vocational / University | 17 | (46%) | 92 | (45%) |  |
| **Area-level disadvantage (SEIFA)** |  |  |  |  | 0.07 |
| Low (≤50th percentile) | 43 | (90%) | 165 | (78%) |  |
| High (>50th percentile) | 5 | (10%) | 46 | (22%) |  |
| **Geographical remoteness (ARIA)** |  |  |  |  | 0.4 |
| Major city | 1 | (2%) | 8 | (4%) |  |
| Inner regional | 22 | (47%) | 107 | (51%) |  |
| Outer regional | 19 | (40%) | 87 | (41%) |  |
| Remote / Very remote | 5 | (11%) | 9 | (4%) |  |
| **Relationship status** |  |  |  |  | 0.7 |
| In a relationship | 40 | (93%) | 185 | (91%) |  |
| Not in a relationship | 3 | (7%) | 18 | (9%) |  |
| **Relationship to patient** |  |  |  |  | 0.6 |
| Spouse/partner | 12 | (92%) | 165 | (82%) |  |
| Other relative | 1 | (8%) | 25 | (12%) |  |
| Other non-relative | 0 | (0%) | 12 | (6%) |  |
| **Cancer type of patient** |  |  |  |  | 0.1 |
| Breast | 9 | (19%) | 38 | (18%) |  |
| Skin | 8 | (17%) | 27 | (13%) |  |
| Head and Neck | 5 | (10%) | 26 | (12%) |  |
| Prostate | 4 | (8%) | 25 | (12%) |  |
| Gynaecological | 2 | (4%) | 20 | (9%) |  |
| Other | 15 | (31%) | 71 | (34%) |  |
| Unknown | 4 | (8%) | 4 | (2%) |  |
| No diagnosis | 1 | (2%) | 0 | (0%) |  |

**Supplementary Table 3.** Comparing characteristics of rural cancer patients employed pre-diagnosis by changes to work post-diagnosis (n=308).

|  | **Change to work post-diagnosis** | | **χ2** | **P value** |
| --- | --- | --- | --- | --- |
| **No change (n=91)** | **Any change  (n=217)** |
|  | **N (%)** | **N (%)** |  |  |
| **Gender** |  |  |  |  |
| Male | 45 (52%) | 110 (51%) | 0.0333 | 0.9 |
| Female | 41 (48%) | 105 (49%) |  |  |
| **Age** |  |  |  |  |
| <65 years | 65 (76%) | 153 (72%) | 0.5157 | 0.5 |
| ≥65 years | 21 (24%) | 61 (28%) |  |  |
| **Education** |  |  |  |  |
| Year 12 or below | 42 (49%) | 115 (54%) | 0.6525 | 0.4 |
| Vocational / University | 44 (51%) | 98 (46%) |  |  |
| **Area-level disadvantage (SEIFA)** |  |  |  |  |
| Low (≤50th percentile) | 74 (81%) | 117 (82%) | 0.0168 | 0.9 |
| High (>50th percentile) | 17 (19%) | 39 (18%) |  |  |
| **Geographical remoteness (ARIA)** |  |  |  |  |
| Major city / Inner regional | 31 (34%) | 104 (48%) | 5.1536 | **0.02** |
| Outer regional / Remote | 60 (66%) | 112 (52%) |  |  |
| **Relationship status** |  |  |  |  |
| In a relationship | 68 (75%) | 137 (63%) | 3.8703 | 0.05 |
| Not in a relationship | 23 (25%) | 80 (37%) |  |  |
| **Cancer type** |  |  |  |  |
| Breast | 29 (32%) | 42 (19%) | 16.7641 | **0.02** |
| Skin | 10 (11%) | 18 (8%) |  |  |
| Head and Neck | 14 (15%) | 32 (15%) |  |  |
| Prostate | 12 (13%) | 16 (7%) |  |  |
| Gynaecological | 2 (2%) | 17 (8%) |  |  |
| Other | 20 (22%) | 85 (39%) |  |  |
| Unknown | 1 (1%) | 3 (1%) |  |  |
| No diagnosis | 3 (3%) | 4 (2%) |  |  |
| **Manual labour** |  |  |  |  |
| Yes | 50 (57%) | 108 (51%) | 1.0549 | 0.3 |
| No | 37 (43%) | 104 (49%) |  |  |
| **Industry** |  |  |  |  |
| Rural (farming, agriculture, maintenance, infrastructure) | 44 (50%) | 99 (47%) | 0.2718 | 0.6 |
| Other (health, education, administration, retail) | 44 (50%) | 113 (53%) |  |  |

*Note: N=308 not 325 because for 17 people there was not enough information to code change to work.*

**Supplementary Table 4.** Comparing characteristics of rural cancer patients employed pre-diagnosis by work cessation post-diagnosis (n=308).

|  | **Stopped work post-diagnosis** | | **χ2** | **P value** |
| --- | --- | --- | --- | --- |
| **No (n=173)** | **Yes (n=135)** |
|  | **N (%)** | **N (%)** |  |  |
| **Gender** |  |  |  |  |
| Male | 91 (54%) | 78 (59%) | 4.8794 | **0.03** |
| Female | 77 (46%) | 55 (41%) |  |  |
| **Age** |  |  |  |  |
| <65 years | 130 (77%) | 88 (67%) | 4.2723 | **0.04** |
| ≥65 years | 38 (23%) | 44 (33%) |  |  |
| **Education** |  |  |  |  |
| Year 12 or below | 82 (49%) | 56 (43%) | 2.1037 | 0.1 |
| Vocational / University | 86 (51%) | 75 (57%) |  |  |
| **Area-level disadvantage (SEIFA)** | |  |  |  |
| Low (≤50th percentile) | 131 (76%) | 120 (89%) | 8.2135 | **0.004** |
| High (>50th percentile) | 41 (24%) | 15 (11%) |  |  |
| **Geographical remoteness (ARIA)** | |  |  |  |
| Major city / Inner regional | 70 (41%) | 65 (48%) | 1.7041 | 0.2 |
| Outer regional / Remote | 102 (59%) | 70 (52%) |  |  |
| **Relationship status** |  |  |  |  |
| In a relationship | 119 (69%) | 86 (64%) | 0.8800 | 0.3 |
| Not in a relationship | 54 (31%) | 49 (36%) |  |  |
| **Cancer type** |  |  |  |  |
| Breast | 54 (31%) | 17 (13%) | 21.1816 | **0.004** |
| Skin | 15 (9%) | 13 (10%) |  |  |
| Head and Neck | 26 (15%) | 20 (15%) |  |  |
| Prostate | 15 (9%) | 13 (10%) |  |  |
| Gynaecological | 8 (5%) | 11 (8%) |  |  |
| Other | 47 (27%) | 58 (43%) |  |  |
| Unknown | 2 (1%) | 1 (1%) |  |  |
| **Manual labour** |  |  |  |  |
| Yes | 83 (50%) | 75 (56%) | 1.2103 | 0.3 |
| No | 83 (50%) | 58 (44%) |  |  |
| **Industry** |  |  |  |  |
| Rural (farming, agriculture, maintenance, infrastructure) | 70 (42%) | 73 (55%) | 4.9935 | **0.03** |
| Other (health, education, administration, retail) | 97 (58%) | 60 (45%) |  |  |

*Note: N=308 not 325 because for 17 people there was not enough information to code change to work.*

**Supplementary Table 5.** Comparing characteristics of rural caregivers employed pre-diagnosis by changes to work post-diagnosis (n=102).

|  | | **Change to work post-diagnosis** | | | | **χ2** | **P value** | | |
| --- | --- | --- | --- | --- | --- | --- | --- | --- | --- |
| **No change (n=45)** | | **Any change  (n=57)** | |
|  | | **N (%)** | | **N (%)** | |  |  | | |
| **Gender** | |  | |  | |  |  | | |
| Male | | 16 (36%) | | 27 (48%) | | 1.4118 | 0.2 | | |
| Female | | 28 (64%) | | 29 (52%) | |  |  | | |
| **Age** | |  | |  | |  |  | | |
| <65 years | | 36 (84%) | | 41 (75%) | | 1.2067 | 0.3 | | |
| ≥65 years | | 7 (16%) | | 14 (25%) | |  |  | | |
| **Education** | |  | |  | |  |  | | |
| Year 12 or below | | 18 (43%) | | 19 (35%) | | 0.6973 | 0.4 | | |
| Vocational / University | | 24 (57%) | | 36 (65%) | |  |  | | |
| **Area-level disadvantage (SEIFA)** | |  | |  | |  |  | | |
| Low (≤50th percentile) | | 31 (69%) | | 46 (81%) | | 1.8966 | 0.2 | | |
| High (>50th percentile) | | 14 (31%) | | 11 (19%) | |  |  | | |
| **Geographical remoteness (ARIA)** | |  | |  | |  |  | | |
| Major city/inner regional | | 26 (58%) | | 28 (49%) | | 0.7561 | 0.4 | | |
| Outer regional/remote | | 19 (42%) | | 29 (51%) | |  |  | | |
| **Relationship status** | |  | |  | |  |  | | |
| In a relationship | | 38 (88%) | | 52 (93%) | | 0.5920 | 0.4 | | |
| Not in a relationship | | 5 (12%) | | 4 (7%) | |  |  | | |
| **Relationship to patient** | |  | |  | |  |  | | |
| Spouse/partner | | 32 (74%) | | 39 (75%) | | 0.5158 | 0.8 | | |
| Other relative | | 8 (19%) | | 11 (21%) | |  |  | | |
| Other non-relative | | 3 (7%) | | 2 (4%) | |  |  | | |
| **Cancer type of person they care for** | | | |  | |  |  | | |
| Breast | | 11 (24%) | | 10 (18%) | | 6.7699 | 0.3 | | |
| Skin | | 6 (13%) | | 8 (14%) | |  |  | | |
| Head and Neck | | 9 (20%) | | 4 (7%) | |  |  | | |
| Prostate | | 2 (4%) | | 3 (5%) | |  |  | | |
| Gynaecological | | 3 (7%) | | 6 (11%) | |  |  | | |
| Other | | 14 (31%) | | 24 (42%) | |  |  | | |
| Unknown | | 0 (0) | | 2 (3%) | |  |  | | |
| No diagnosis | | 0 (0) | | 0 (0) | |  |  | | |
| **Manual labour** |  | |  | |  | | |  |
| Yes | 13 (30%) | | 33 (58%) | | 7.5503 | | | **0.006** |
| No | 30 (70%) | | 24 (42%) | |  | | |  |
| **Industry** |  | |  | |  | | |  |
| Rural (farming, agriculture, maintenance, infrastructure) | 15 (35%) | | 26 (46%) | | 1.1666 | | | 0.3 |
| Other (health, education, administration, retail) | 28 (65%) | | 31 (54%) | |  | | |  |

*Note: N=102 not 103 because for 1 person there was not enough information to code change to work.*

**Supplementary Table 6.** Comparing characteristics of rural caregivers employed pre-diagnosis by work cessation post-diagnosis (n=102).

|  | **Stopped work post-diagnosis** | | **χ2** | **P value** |
| --- | --- | --- | --- | --- |
| **No (n=81)** | **Yes (n=21)** |
|  | **N (%)** | **N (%)** |  |  |
| **Gender** |  |  |  |  |
| Male | 34 (43%) | 9 (43%) | 0.0002 | 1.0 |
| Female | 45 (57%) | 12 (57%) |  |  |
| **Age** |  |  |  |  |
| <65 years | 65 (84%) | 12 (57%) | 7.2893 | **0.007** |
| ≥65 years | 12 (16%) | 9 (43%) |  |  |
| **Education** |  |  |  |  |
| Year 12 or below | 31 (40%) | 6 (30%) | 0.7083 | 0.4 |
| Vocational / University | 46 (60%) | 14 (70%) |  |  |
| **Area-level disadvantage (SEIFA)** | |  |  |  |
| Low (≤50th percentile) | 59 (73%) | 18 (86%) | 1.4940 | 0.2 |
| High (>50th percentile) | 22 (27%) | 3 (14%) |  |  |
| **Geographical remoteness (ARIA)** | |  |  |  |
| Major city/inner regional | 42 (52%) | 12 (57%) | 0.1874 | 0.7 |
| Outer regional/remote | 39 (48%) | 9 (43%) |  |  |
| **Relationship status** |  |  |  |  |
| In a relationship | 72 (91%) | 18 (90%) | 0.0251 | 0.9 |
| Not in a relationship | 7 (9%) | 2 (10%) |  |  |
| **Relationship to patient** |  |  |  |  |
| Spouse/partner | 59 (77%) | 12 (67%) | 0.8688 | 0.6 |
| Other relative | 14 (18%) | 5 (28%) |  |  |
| Other non-relative | 4 (5%) | 1 (6%) |  |  |
| **Cancer type of person they care for** | |  |  |  |
| Breast | 19 (23%) | 2 (10%) | 3.9700 | 0.7 |
| Skin | 10 (12%) | 4 (19%) |  |  |
| Head and Neck | 11 (14%) | 2 (10%) |  |  |
| Prostate | 4 (5%) | 1 (5%) |  |  |
| Gynaecological | 6 (7%) | 3 (14%) |  |  |
| Other | 29 (36%) | 9 (43%) |  |  |
| Unknown | 2 (3%) | 0 (0) |  |  |
| **Manual labour** |  |  |  |  |
| Yes | 34 (43%) | 12 (57%) | 1.3287 | 0.2 |
| No | 45 (57%) | 9 (43%) |  |  |
| **Industry** |  |  |  |  |
| Rural (farming, agriculture, maintenance, infrastructure) | 34 (43%) | 7 (33%) | 0.6459 | 0.4 |
| Other (health, education, administration, retail) | 45 (57%) | 14 (67%) |  |  |

*Note: N=102 not 103 because for 1 person there was not enough information to code change to work.*
